# Supplementary material
Source: publisher figshare collection journal article supplement (https://karger.figshare.com/ndownloader/files/25037942)
Supplement: Supplementary file 1 [file 25037942]

**Ausgeschlossene Quellen**

Nach der Eignungsbeurteilung aufgrund des Volltextes wurden für den Review die folgenden Referenzen ausgeschlossen (1-31):

1. Albrecht BH. Verbesserung der Immunregulation durch Anwendung einer Serie vierwöchigen Wassertretens nach Kneipp [Dissertation]. Halle-Wittenberg: Martin-Luther-Universität Halle-Wittenberg; 2003.

2. Fialka-Moser V. Hydrotherapie und Balneotherapie in Theorie und Praxis. München: Richard Pflaum Verlag; 2009.

3. Fischer MJ, Gutenbrunner C, Ptok M. Intensified voice therapy: a new model for the rehabilitation of patients suffering from functional dysphonias. International Journal of Rehabilitation Research. 2009;32(4):348-55.

4. Girts S. Kneipp-Anwendungen in der Pflege wirken positiv auf die Gesundheit. CNE Pflegemanagement. 2016;03(04):18.

5. Goedsche K. Prospektive, kontrollierte klinische Studie zum Einfluß serieller Kaltwasserreize (Kneippscher Oberguß) auf die Lungenfunktion, die Immunabwehr und die Befindlichkeit von Patienten mit chronisch obstuktiver Bronchitis (COPD) [Dissertation]. Jena: Friedrich - Schiller - Universität Jena; 2005.

6. Jacob E-M. Wirksamkeitsnachweis hydrotherapeutischer Anwendungen in der Behandlung der primären arteriellen Hypertonie Grad I/Grad II nach der WHO-Klassifikation [Dissertation]. München: Technische Universität München; 2006.

7. Kennemann C. Randomisierte klinische Interventionsstudie zum Einfluss von Walking und einer naturheilkundlichen Intervention auf Erschöpfung, psychologische und immunologische Parameter von Brustkrebsüberlebenden mit Tumorassoziierter Fatigue [Dissertation]. Duisburg-Essen: Universität Duisburg-Essen; 2008.

8. Kohler P. Der Heublumensack: Ergebnisse einer epidemiologischen Studie bei Patienten während einer Kneippkur [Dissertation]. Würzburg: Universität Würzburg; 2001.

9. Lauche R, Langhorst J. Studie zur Wirksamkeit von Kümmelölleibauflagen bei Patienten mit Reizdarmsyndrom. Zeitschrift für Phytotherapie. 2015;36(06):244-6.

10. Michalsen A. Current perspective of comprehensive lifestyle modification in cardiac patients: impact of nutritional therapy, stress reduction and hydrotherapy. Medicina naturista. 2004:43-5.

11. Michalsen A, Paul A, Knoblauch N, Pithan C, Langhorst J, Dobos G. Umsetzung und Wirksamkeit einer integrativen Lebensstilmodifikation bei Koronarkranken im Zeitalter der interventionellen Kardiologie. J Erfahrungsheilkunde. 2005;54(11):703-11.

12. Nct. Hydrotherapy Against Menopausal Symptoms in Breast Cancer Survivors. Available from: <https://www.cochranelibrary.com/central/doi/10.1002/central/CN-01582523/full> [Access Date: 28.05.2020]

13. Nct. Kneipp Water Applications for Insomnia. Available from: <https://www.cochranelibrary.com/central/doi/10.1002/central/CN-01575906/full> [Access Date: 28.05.2020]

14. Ortiz M. Integration von Naturheilverfahren in die stationäre Altenpflege. Zeitschrift für Komplementärmedizin. 2015;07(06):51-5.

15. Ortiz M, Schnabel K, Binting S, Fischer HF, Teut M, Suhr R, et al. Complementary and Integrative Medicine in Nursing Homes: Results of a Cross-Sectional Study in Residents and Caregivers. Complementary medicine research. 2019;26(5):310-21.

16. Ortiz M, Schnabel K, Teut M, Rotter G, Binting S, Cree M, et al. Complementary and Integrative Medicine in nursing homes-effects on caregivers in a prospective, exploratory, comparative, two-armed cohort study. BMC Complementary and Alternative Medicine Conference: World Congress Integrative Medicine and Health. 2017;17(1).

17. Ortiz M, Schnabel K, Walbaum T, Binting S, Fischer F, Teut M, et al. Implementation of naturopathic methods in geriatric nursing homes-results of a cross-sectional study. European Journal of Integrative Medicine. 2012;4:63-4.

18. Ortiz M, Stange R, Kundt G, Doeren M, Uehleke B. Kneipp hydrotherapy for menopausal symptoms—Results of a pilot study. J European Journal of Integrative Medicine. 2008;1:39.

19. Ortiz M, Ammann ES, Gross CS, Schnabel K, Walbaum T, Binting S, et al. Complementary medicine in nursing homes - Results of a mixed methods pilot study. BMC Complementary and Alternative Medicine. 2014;12(14):443.

20. Ostermann T, Beer A-M, Matthiessen P. Evaluation stationärer Naturheilkunde–das Blankensteiner Modell. Teil II: Effektstärken und Gesundheitsstatus der Patienten im zeitlichen Verlauf. J Complementary Medicine Research. 2002;9(5):269-76.

21. Redlich K. Über die Wirkung von Lehmpackungen auf die Lebensqualität und die Stauungsbeschwerden bei Patienten mit chronisch venöser Insuffizienz (CVI) [Dissertation]. Frankfurt am Main: Johann Wolfgang Goethe-Universität Frankfurt am Main; 2011.

22. Šarac M, Sekulić D, editors. Contemporary approach in the treatment of varicose syndrome of the lower extremities - the possibility of spa threatment. TISC-Tourism International Scientific Conference Vrnjačka Banja; 2017.

23. Schencking M, Otto A, Deutsch T, Sandholzer H. A comparison of Kneipp hydrotherapy with conventional physiotherapy in the treatment of osteoarthritis of the hip or knee: protocol of a prospective randomised controlled clinical trial. BMC Musculoskeletal Disorders. 2009;10:104.

24. Schencking M, Bohmhammel J, Keller C. Stationäre, naturheilkundliche Therapie eines komplexen regionalen Schmerzsyndroms (CRPS I). Forschende Komplementarmedizin. 2009;16(2):117-22.

25. Schencking M, Kraft K. Stationäre naturheilkundliche Therapie eines chronischen, postoperativen Schmerzsyndroms nach Neck-Dissection Forschende Komplementarmedizin. 2010;17(2):81-6.

26. Schuh A, Stier-Jarmer M, Frisch D, Kus S. Wissenschaftlich fundierte Kurortmedizin heute: Entwicklung und Evaluation multimodaler Präventionsprogramme in den bayerischen Kurorten. Gesundheitswesen. 2015;77(08/09):A373.

27. Spyropoulos A, Tapkiran O. Auswirkungen thermoneutraler Ganzkörper-Immersion auf die Befindlichkeit von Patienten mit Depressionen und/oder Angststörungen [Dissertation]. Hannover: Medizinischen Hochschule Hannover; 2012.

28. Sujatha K, Vasant V, Shetty P. Comparative Study on Naturopathic Treatments Cold and Hot Spinal Bath on Autonomic and Respiratory Variables in Healthy Volunteers. IAETSD Journal for advanced research in apploed sciences. 2018;5(7).

29. Uehleke B. Kneipp'sche Hydrotherapie in der Kinderheilkunde. Zeitschrift für Komplementärmedizin. 2009;1(04):18-23.

30. Uehleke B, Koch B. Kneipptherapie bei Polyneuropathie. Zeitschrift für Komplementärmedizin. 2012;4(01):23-6.

31. Walbaum T. Prävention in der Pflege: Naturheilkundliche Maßnahmen in Seniorenwohnheimen: eine Querschnittstudie [Dissertation]. Berlin: Charité - Universitätsmedizin Berlin; 2016.
